# Supplementary material for: RND transporters protect Corynebacterium glutamicum from antibiotics by assembling the outer membrane
Source: PubMed Central journal article supplement (PMC4287177; doi:10.1002/mbo3.182), 2014-06-18
Supplement: mbo30003-0484-sd1.pdf [file mbo30003-0484-sd1.pdf]

## Supplemental Data

### **RND transporters protect *Corynebacterium glutamicum* from antibiotics by assembling the outer membrane**

**Liang Yang<sup>a</sup>, Shuo Lu<sup>a</sup>, Juan Belardinelli<sup>b</sup>, Emilie Huc-Claustre<sup>b</sup>, Victoria Jones<sup>b</sup>, Mary Jackson<sup>b</sup>, Helen I. Zgurskaya<sup>a,1</sup>**

<sup>a</sup> University of Oklahoma, Department of Chemistry and Biochemistry, 101 Stephenson Parkway, Norman, OK 73019;

<sup>b</sup> Mycobacteria Research Laboratories; Department of Microbiology, Immunology and Pathology; Colorado State University

<sup>1</sup> To whom correspondence should be addressed. E.mail: [elenaz@ou.edu](mailto:elenaz@ou.edu)

**Table S1. Strains and plasmids used in this study**

| Strain/plasmid        | Description                                                                                                                             | Source                                |
|-----------------------|-----------------------------------------------------------------------------------------------------------------------------------------|---------------------------------------|
| <i>E. coli</i>        |                                                                                                                                         |                                       |
| DH5 $\alpha$          | <i>supE44 <math>\Delta</math>lacU169 hsdR17 recA1 gyrA96 thi-1 relA1</i>                                                                |                                       |
| S17-1                 | <i>recA pro hsdR RP4-2-Tc::Mu-Km::Tn7</i>                                                                                               |                                       |
| <i>C. glutamicum</i>  |                                                                                                                                         |                                       |
| WT                    | Wild type <i>C. glutamicum</i> ATCC13032                                                                                                | ATCC                                  |
| $\Delta$ <i>pks13</i> | ATCC13032 $\Delta$ <i>pks13::km</i>                                                                                                     | (Portevin <i>et al.</i> , 2004)       |
| LY100                 | $\Delta$ <i>cmpL1</i> ( <i>Ncgl2769</i> )                                                                                               | This study                            |
| LY101                 | $\Delta$ <i>cmpL2</i> ( <i>Ncgl0887</i> )                                                                                               | This study                            |
| LY102                 | $\Delta$ <i>cmpL3</i> ( <i>Ncgl0599</i> )                                                                                               | This study                            |
| LY103                 | $\Delta$ <i>cmpL4</i> ( <i>Ncgl0228</i> )                                                                                               | This study                            |
| LY104                 | $\Delta$ <i>cmpL1</i> $\Delta$ <i>cmpL3</i>                                                                                             | This study                            |
| LY105                 | $\Delta$ <i>cmpL2</i> $\Delta$ <i>cmpL3</i>                                                                                             | This study                            |
| LY106                 | $\Delta$ <i>cmpL2</i> $\Delta$ <i>cmpL4</i>                                                                                             | This study                            |
| LY107                 | $\Delta$ <i>cmpL3</i> $\Delta$ <i>cmpL4</i>                                                                                             | This study                            |
| LY108                 | $\Delta$ <i>cmpL1</i> $\Delta$ <i>cmpL2</i> $\Delta$ <i>cmpL3</i>                                                                       | This study                            |
| LY109                 | $\Delta$ <i>cmpL2</i> $\Delta$ <i>cmpL3</i> $\Delta$ <i>cmpL4</i>                                                                       | This study                            |
| LY110                 | Tc <sup>R</sup> ; $\Delta$ <i>cmpL1</i> $\Delta$ <i>cmpL4</i> (pML1-Tc)                                                                 | This study                            |
| LY111                 | Tc <sup>R</sup> ; $\Delta$ <i>cmpL1</i> $\Delta$ <i>cmpL4</i> (pML4-Tc)                                                                 | This study                            |
| LY112                 | Tc <sup>R</sup> ; $\Delta$ <i>cmpL1</i> $\Delta$ <i>cmpL2</i> $\Delta$ <i>cmpL3</i> $\Delta$ <i>cmpL4</i> (pML1-Tc)                     | This study                            |
| LY113                 | Tc <sup>R</sup> ; $\Delta$ <i>cmpL1</i> $\Delta$ <i>cmpL2</i> $\Delta$ <i>cmpL3</i> $\Delta$ <i>cmpL4</i> (pML4-Tc)                     | This study                            |
| LY114                 | $\Delta$ <i>cmpL1</i> $\Delta$ <i>cmpL2</i> $\Delta$ <i>cmpL3</i> $\Delta$ <i>cmpL4</i> <i>ppc::lacI-P<sub>tac</sub>-cmpL1</i>          | This study                            |
| LY115                 | $\Delta$ <i>cmpL1</i> $\Delta$ <i>cmpL2</i> $\Delta$ <i>cmpL3</i> $\Delta$ <i>cmpL4</i> <i>ppc::lacI-P<sub>tac</sub>-cmpL4</i>          | This study                            |
| LY116                 | Tc <sup>R</sup> ; $\Delta$ <i>cmpL1</i> $\Delta$ <i>cmpL2</i> $\Delta$ <i>cmpL3</i> $\Delta$ <i>cmpL4</i> (pML4-Tgt-Tc)                 | This study                            |
| <i>Plasmids</i>       |                                                                                                                                         |                                       |
| pAN6                  | Kan <sup>R</sup> ; <i>C. glutamicum</i> / <i>E. coli</i> shuttle vector                                                                 | (Frunzke <i>et al.</i> , 2008)        |
| pK19 <i>mob-sacB</i>  | Kan <sup>R</sup> ; vector for allelic exchange in <i>C. glutamicum</i> (pK18ori <sub>V<sub>E.c.</sub></sub> <i>sacB lacZ</i> $\alpha$ ) | (Schafer <i>et al.</i> , 1994)        |
| pML1                  | Kan <sup>R</sup> ; pAN6 derivative containing P <sub>tac</sub> - <i>cmpL1</i>                                                           | This study                            |
| pML3                  | Kan <sup>R</sup> ; pAN6 derivative containing P <sub>tac</sub> - <i>cmpL3</i>                                                           | This study                            |
| pML4                  | Kan <sup>R</sup> ; pAN6 derivative containing P <sub>tac</sub> - <i>cmpL4</i>                                                           | This study                            |
| pDG1514               | Tc <sup>R</sup> ; plasmid contains a tetracycline cassette                                                                              | (Guerout-Fleury <i>et al.</i> , 1995) |
| pML1-Tc               | Tc <sup>R</sup> ; pML1 with tetracycline cassette                                                                                       | This study                            |
| pML4-Tc               | Tc <sup>R</sup> ; pML4 with tetracycline cassette                                                                                       | This study                            |
| pML4-Tgt-Tc           | Tc <sup>R</sup> ; pAN6 derivative containing P <sub>tac</sub> - <i>cmpL4-tgt</i> ( <i>Ncgl0228-0229</i> )                               | This study                            |

**Table S2. Antibiotic susceptibility of *C. glutamicum* cells lacking *cmpLs*.**

| Strain | MIC ( $\mu\text{g/ml}$ ) |     |        |      |       |      |           |      |         |            |            |
|--------|--------------------------|-----|--------|------|-------|------|-----------|------|---------|------------|------------|
|        | CAR                      | CHL | RIF    | LIN  | NOR   | VAN  | NOV       | GM   | TOB     | SPE        | EB         |
| WT     | 3-6                      | 3   | 0.0125 | 6.25 | 1.5-3 | 0.38 | 6.25-12.5 | 0.19 | 0.1-0.2 | 31.25-62.5 | 3.125-6.25 |
| LY100  | 3-6                      | 3   | 0.0125 | 6.25 | 1.5-3 | 0.38 | 6.25-12.5 | 0.19 | 0.1-0.2 | 31.25-62.5 | 1.56-3.125 |
| LY103  | 3-6                      | 3   | 0.0125 | 6.25 | 1.5-3 | 0.38 | 6.25-12.5 | 0.19 | 0.1-0.2 | 31.25-62.5 | 1.56-3.125 |
| LY104  | 3-6                      | 3   | 0.0125 | 6.25 | 1.5-3 | 0.38 | 6.25-12.5 | 0.19 | 0.1-0.2 | 31.25-62.5 | 1.56-3.125 |
| LY106  | 3-6                      | 3   | 0.0125 | 6.25 | 1.5-3 | 0.38 | 6.25-12.5 | 0.19 | 0.1-0.2 | 31.25-62.5 | 1.56-3.125 |
| LY107  | 3-6                      | 3   | 0.0125 | 6.25 | 1.5-3 | 0.38 | 6.25-12.5 | 0.19 | 0.1-0.2 | 31.25-62.5 | 1.56-3.125 |
| LY108  | 3-6                      | 3   | 0.0125 | 6.25 | 1.5-3 | 0.38 | 6.25-12.5 | 0.19 | 0.1-0.2 | 31.25-62.5 | 1.56-3.125 |
| LY109  | 3-6                      | 3   | 0.0125 | 6.25 | 1.5-3 | 0.38 | 6.25-12.5 | 0.19 | 0.1-0.2 | 31.25-62.5 | 1.56-3.125 |

CAR, carbenicillin; CHL, chloramphenicol; RIF, rifampicin; VAN, vancomycin; LIN, lincomycin; NOR, norfloxacin; NOV, novobiocin; GM, gentamycin; TOB, tobramycin; SPE, spectinomycin; EB, ethidium bromide

**Table S3. Antibiotic susceptibility of *C. glutamicum* mutant cells overproducing various CmpL proteins.**

| Strains     | IPTG<br>(mM) | Diameters (mm) |          |          |          |          |          |
|-------------|--------------|----------------|----------|----------|----------|----------|----------|
|             |              | CAR            | NOR      | SPE      | TOB      | EB       | NOV      |
| WT(pAN6)    | -            | 25.9±0.2       | 26.8±0.3 | 13.9±0.7 | 27.5±0.4 | 28.0±0.7 | 21.1±0.7 |
|             | 0.1          | 25.8±0.3       | 27.3±0.3 | 13.8±0.3 | 28.5±0.5 | 28.5±0.5 | 21.8±0.3 |
| LY108(pML1) | -            | 25.6±0.4       | 26.4±0.4 | 13.4±0.4 | 28.5±0.5 | 27.8±0.2 | 21.8±0.3 |
|             | 0.01         | 27.6±1.1       | 26.9±1.1 | 13.4±0.4 | 28.4±0.4 | 27.9±0.2 | 22.7±0.9 |
| LY108(pML3) | -            | 25.5±0.5       | 26.5±0.5 | 14.0±0.8 | 27.8±0.3 | 27.3±0.5 | 22.4±0.4 |
|             | 0.01         | 25.8±0.7       | 26.8±0.6 | 13.4±0.4 | 28.3±0.5 | 27.7±0.7 | 22.3±0.6 |
| LY109(pML4) | -            | 25.5±0.4       | 27.5±0.3 | 13.8±0.6 | 28.3±0.3 | 28.0±0.8 | 21.8±0.2 |
|             | 0.1          | 25.9±0.7       | 27.7±0.5 | 14.1±1.1 | 30.0±0.8 | 27.7±0.5 | 22.3±0.6 |

**Table S4 Primers used in this study**

| <b>Name</b>                                                 | <b>Sequences(5'-3')</b>                        |
|-------------------------------------------------------------|------------------------------------------------|
| <i>Primers used for crossover PCR</i>                       |                                                |
| Cmpl1-del-1                                                 | ACTGAATTCTCCTTCTAGTGTGGGACGCTC                 |
| Cmpl1-del-2                                                 | CCCATCCACTAAACTTAAACAAGCTTGGTGCCGAAAATGAC      |
| Cmpl1-del-3                                                 | TGTTTAAGTTTAGTGGATGGGCTCAACGACGATGAGGAAGTCACC  |
| Cmpl1-del-4                                                 | ATTGAATTCTTTTCGACGAAGCCCCACTCCC                |
| Cmpl2-del-1                                                 | TACGAGGTCTGCGGTGGCAATG                         |
| Cmpl2-del-2                                                 | CCCATCCACTAAACTTAAACACCGCCAGCGTCGTGATACCTATGAG |
| Cmpl2-del-3                                                 | TGTTTAAGTTTAGTGGATGGGAAGGAAAATGTAGGTGTCCG      |
| Cmpl2-del-4                                                 | ACTGAATTCAATGCGACTCCATCTTCTATG                 |
| Cmpl3-del-1                                                 | ACTGCATGCCCAATGAGAGCAGCGGCAATT                 |
| Cmpl3-del-2                                                 | CCCATCCACTAAACTTAAACAGGGCAGAAAGATTCTCATCAAGCG  |
| Cmpl3-del-3                                                 | TGTTTAAGTTTAGTGGATGGGTGGCCGTCAAATTGTCCAATCAG   |
| Cmpl3-del-4                                                 | ACTTCTAGATCTCTAGCCGTTTTTTTGC                   |
| Cmpl4-del-1                                                 | ACTGTCGACTCCCGTACTTGTTCAGGATTAG                |
| Cmpl4-del-2                                                 | CCCATCCACTAAACTTAAACAGAATAGCAATTTCCGCCACGG     |
| Cmpl4-del-3                                                 | TGTTTAAGTTTAGTGGATGGGCGGGCGTGTTCGATGCTTTC      |
| Cmpl4-del-4                                                 | TTCGTCGACAAGCGCCATGC                           |
| <i>Primers used to verify mutants</i>                       |                                                |
| Cmpl1-mut-f                                                 | CAATCCCACTGACAAAGAAGGC                         |
| Cmpl1-mut-r                                                 | CGGTGAGCGAGACCGAGC                             |
| Cmpl2-mut-f                                                 | CATGATTGCGCGTTGTCC                             |
| Cmpl2-mut-r                                                 | TTCTTAATCCAGGCGCATGC                           |
| Cmpl3-mut-f                                                 | GTTAATTTTCTGGAATGCC                            |
| Cmpl3-mut-r                                                 | TGAGTCGGCTAAAACAG                              |
| Cmpl4-mut-f                                                 | GCTAACAAGGTTCTGGGTG                            |
| Cmpl4-mut-r                                                 | CAGATTTGAAATCCACGC                             |
| <i>Primers used for construction of expression plasmids</i> |                                                |
| Cmpl1-Exp-f                                                 | TAATCCACATATGTTTTCTAAATGGGGCCACTTTG            |
| Cmpl1-Exp-r                                                 | ATATTCGCGCTAGCATCTAGATCCTCAAGCCTG              |
| Cmpl3-Exp-f                                                 | GGCGGCATATGTCTACTAGCATCACAACAGAG               |
| Cmpl3-Exp-r                                                 | GGATGTCTAGATAGCTGAGGCTGCTTCTG                  |
| Cmpl4-Exp-f                                                 | GAAGAACCATATGGCGAAATTGCTATTCAGG                |
| Cmpl4-Exp-r                                                 | TAATAATAGCTAGCACGTGCAGCCTGCTTCTC               |
| Cmpl4+Tgt-Exp                                               | TCCTGATA GCTAGCTGAAACCTTCGACGCGTAG             |
| <i>Primers for amplification of tetracycline cassette</i>   |                                                |
| Tc cassette-f                                               | CAAGCCCAGGGAACATGAGAATTCCTG                    |
| Tc cassette-r                                               | TTCGCCCGGGTCTGCAGATAGTGTAC                     |

## References

- Frunzke, J., V. Engels, S. Hasenbein, C. Gatgens & M. Bott, (2008) Co-ordinated regulation of gluconate catabolism and glucose uptake in *Corynebacterium glutamicum* by two functionally equivalent transcriptional regulators, GntR1 and GntR2. *Mol Microbiol* 67: 305-322.
- Guerout-Fleury, A.M., K. Shazand, N. Frandsen & P. Stragier, (1995) Antibiotic-resistance cassettes for *Bacillus subtilis*. *Gene* 167: 335-336.
- Portevin, D., C. de Sousa-D'Auria, C. Houssin, C. Grimaldi, M. Chami, M. Daffé & C. Guilhot, (2004) A polyketide synthase catalyzes the last condensation step of mycolic acid biosynthesis in mycobacteria and related organisms. *Proceedings of the National Academy of Sciences* 101: 314-319.
- Schafer, A., A. Tauch, W. Jager, J. Kalinowski, G. Thierbach & A. Puhler, (1994) Small mobilizable multi-purpose cloning vectors derived from the *Escherichia coli* plasmids pK18 and pK19: selection of defined deletions in the chromosome of *Corynebacterium glutamicum*. *Gene* 145: 69-73.

**A**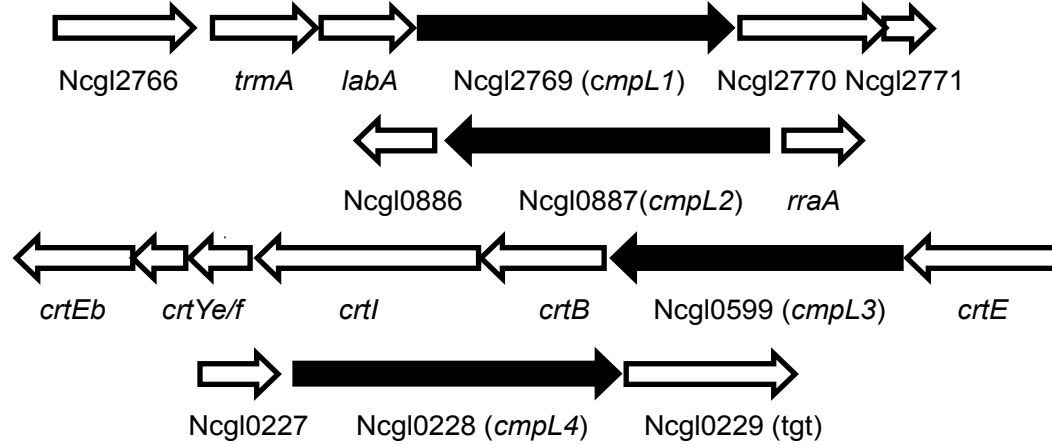**B**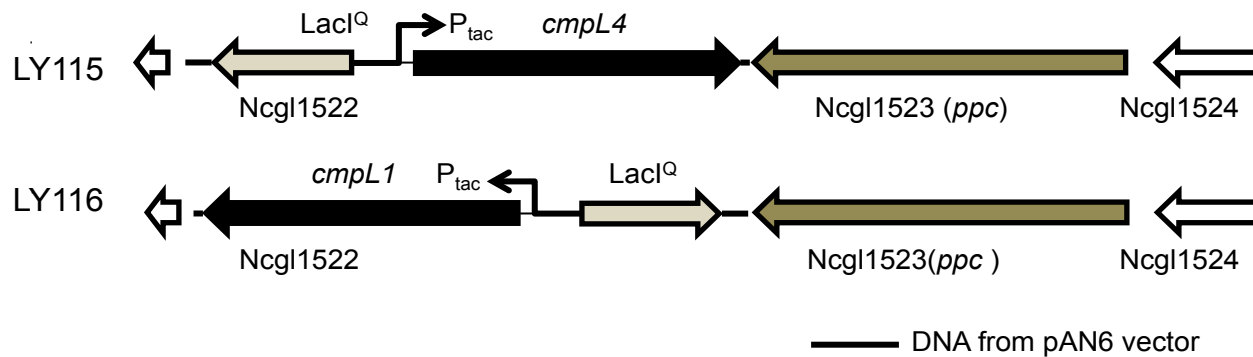

Fig. S1. (A) Genetic contexts of four *cmpL* genes encoded on *C. glutamicum* chromosome. (B) Localization and orientation of *cmpL1* and *cmpL4* genes expressed under the IPTG -inducible *P<sub>tac</sub>* promoter in LY115 and LY116.

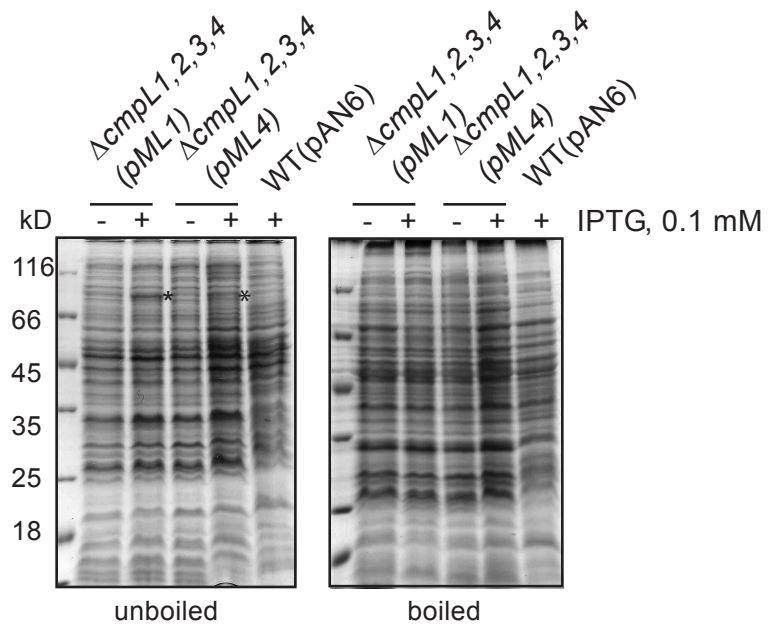

Fig. S2. Protein composition of membranes isolated from LY112 ( $\Delta cmpL1,2,3,4$  (pML1-Tc)) and LY113 ( $\Delta cmpL1,2,3,4$  (pML4-Tc)) in the presence and absence of IPTG. Membrane fractions were isolated by ultracentrifugation and analyzed by 12% SDS-PAGE. Overproduced CmpL1 and CmpL4 can be seen in unboiled samples (marked with asterisk).



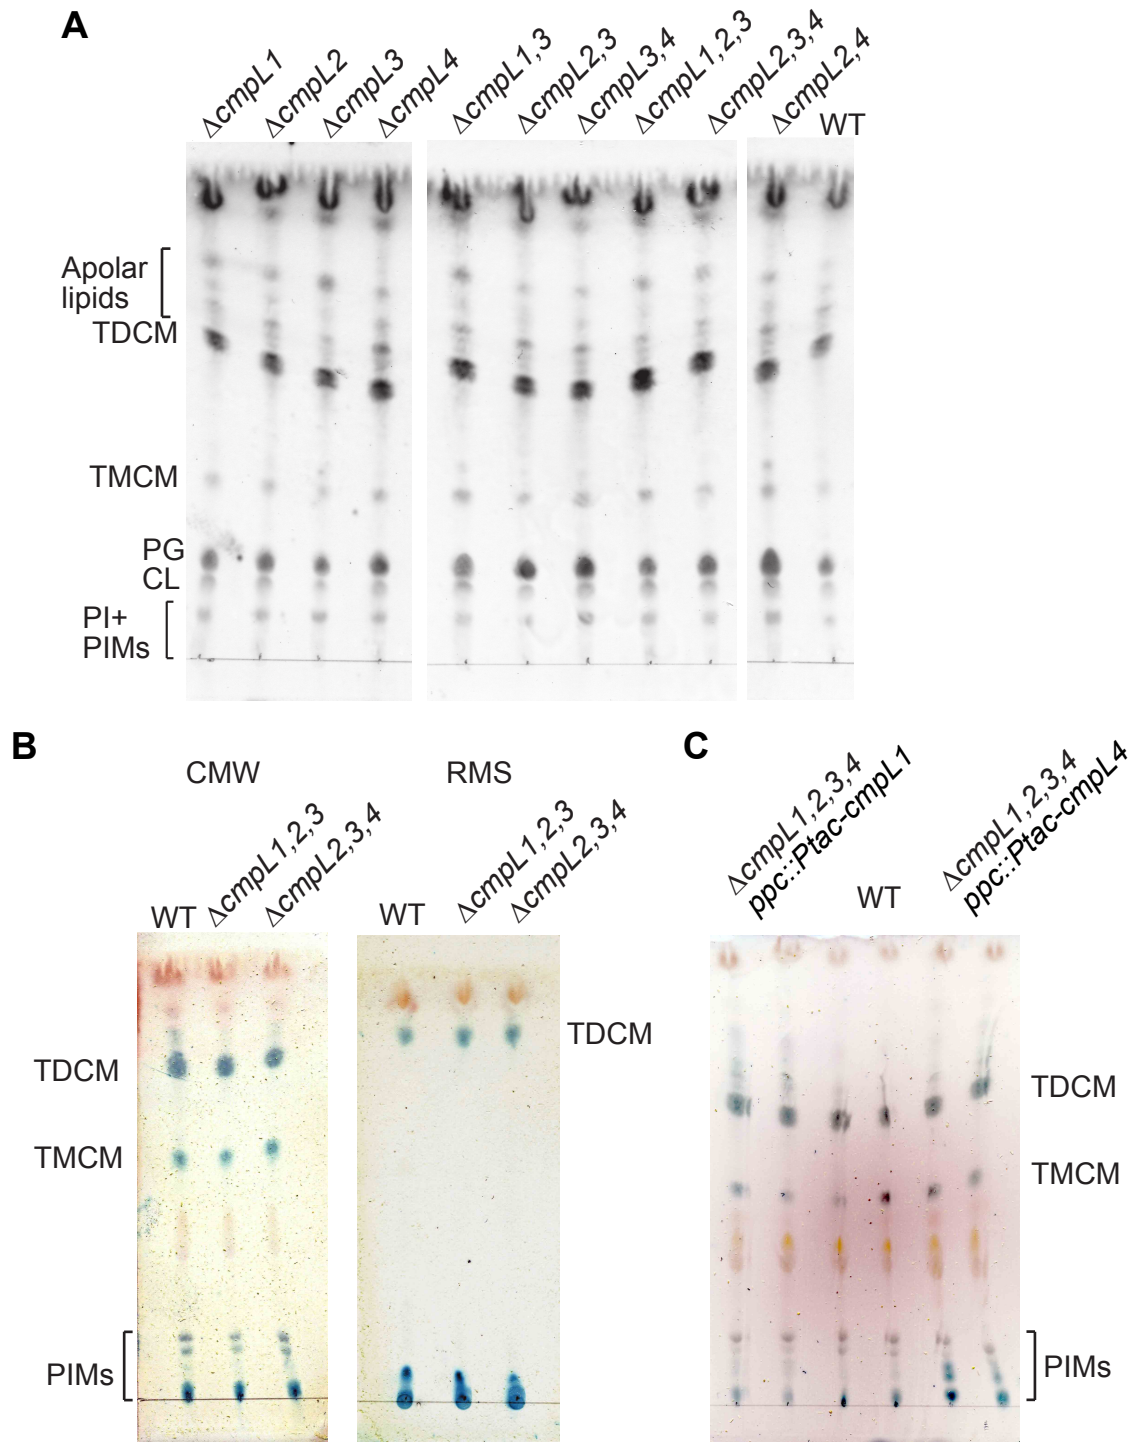

Fig. S3. Composition of lipids extracted from *C. glutamicum* mutants. (A) Cells were grown in the minimal medium and noncovalently associated lipids extracted with CMW mixture. TLC was carried out with C:M:W 30:8:1 as the mobile phase and lipids were stained with 5% phosphomolybdic solution. (B) Mutant cells were grown in minimal medium. Lipids were extracted either with CMW (left panel) or RMS (right) mixtures, separated on TLC plates with C:M:W 30:8:1 as the mobile phase and stained with anthrone. (C). Glycolipid composition of LY114 and LY115 knockin mutant strains. Lipids were extracted from cells grown in minimal medium with CMW and analyzed as in (B).

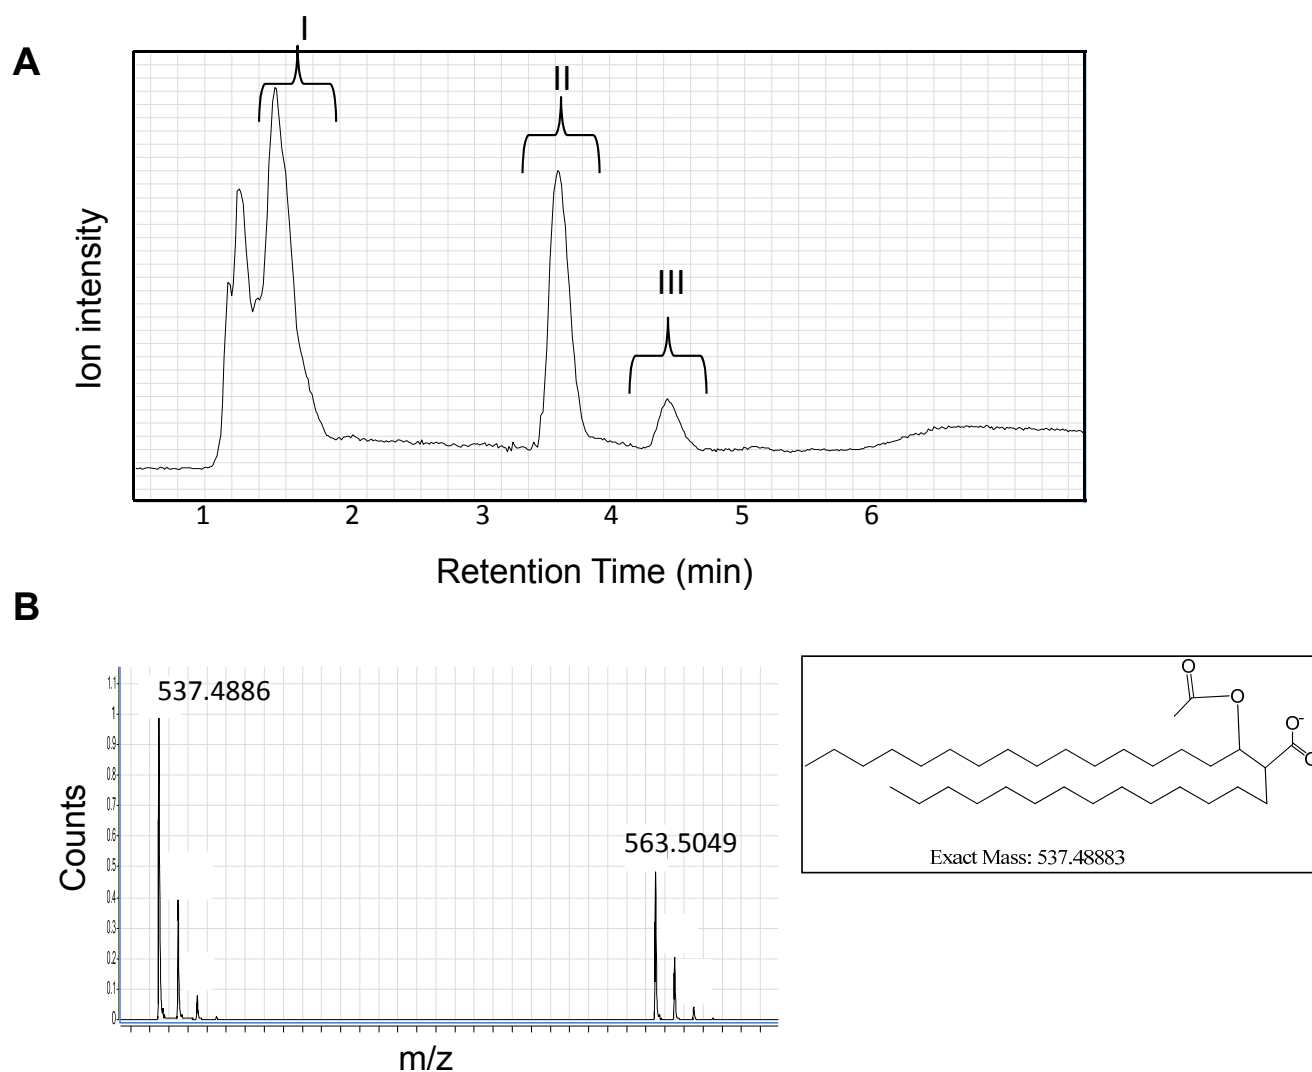

Fig. S4. (A) LC/MS chromatogram of Lipid X. Component I which barely stuck to the reversed phase LC column was not further analyzed and may or may not be part of the Lipid X TLC spot. Component III is like component II except it is based on a C-34 fully saturated corynomylate. (B) The mass spectrum of component II consistent with acetylated C-32 fully saturated corynomylate ( $m/z = 537.4886$ ) whose structure is shown on the right) and monounsaturated C-34 corynomylate ( $m/z = 563.5049$ ).

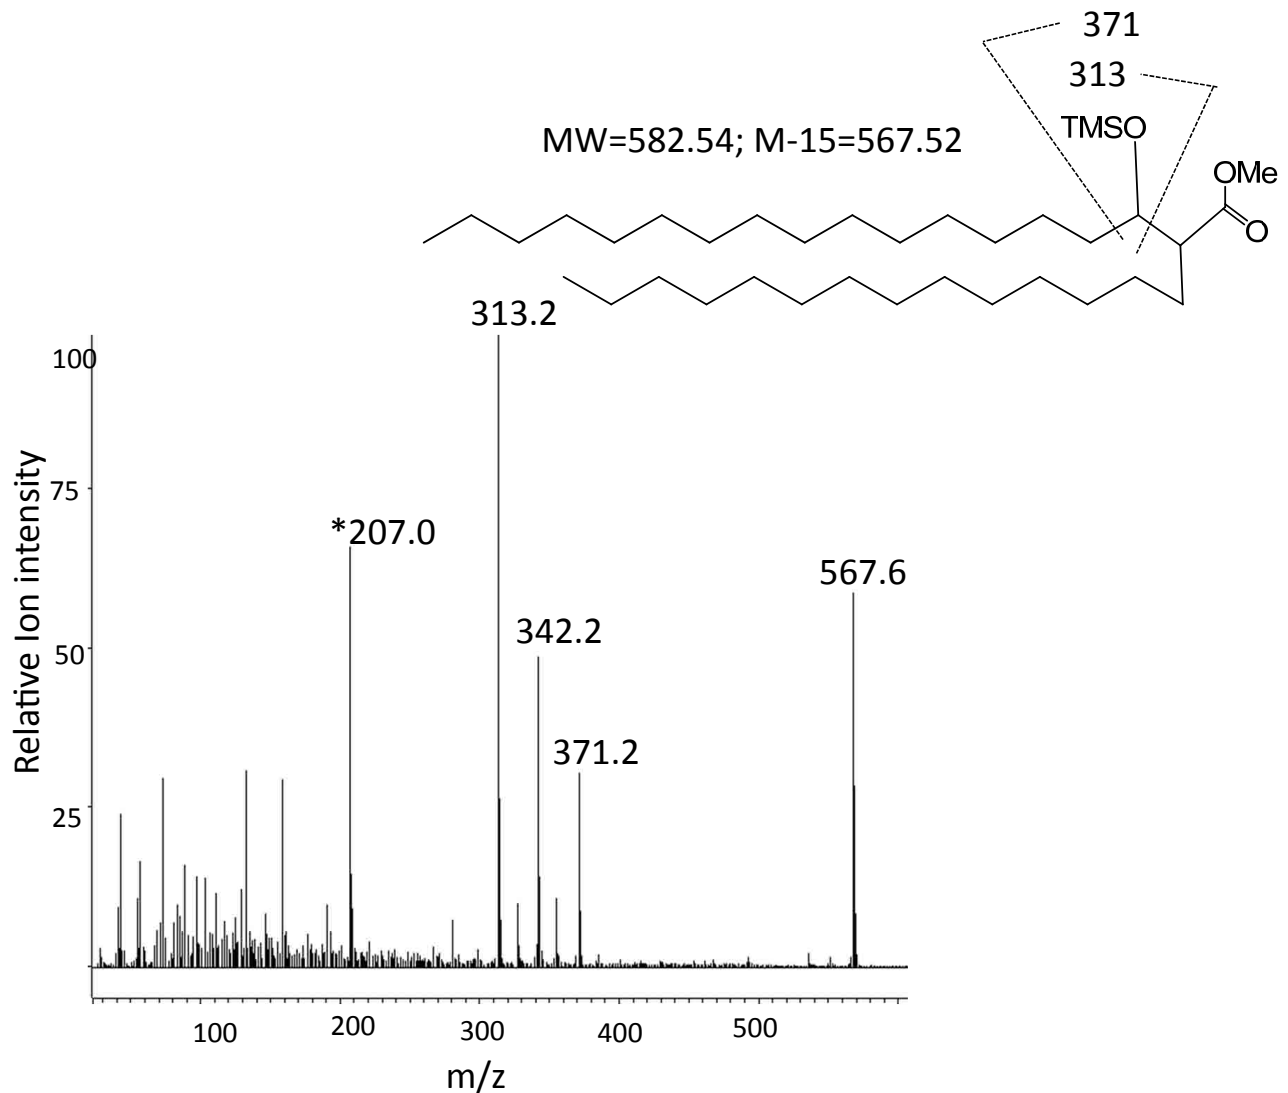

Fig. S5. The structure of the methyl ester trimethylsilyl ether of C-32 corynomycolate as determined by GC/MS after formation of the methyl ester and trimethylsilylation of the alcohol. The m/z 207 ion (asterisk) is from column bleed. M-15 is 567.6. The original LC/MS analysis also had a complex early eluting peak containing ions at m/z 485.3854, 489.3359, and 521.3622 and the GC/MS had many components in addition to the corynomycolates. These possible other components have not been investigated.
